# Supplementary material for: Pulmonary and Gastrointestinal Parasitic Infections in Small Ruminant Autochthonous Breeds from Centre Region of Portugal—A Cross Sectional Study
Source: MDPI journal article supplement (doi:10.3390/ani14081241), 2024-04-21
Supplement: s1 [file s1]

**Table S1.** Association between sheep *Haemonchus contortus* infection and background information, including animal signalment and parasitological information (n=208).

| Variable                                         | Total | Presence<br>n (%) | Absence<br>n (%; %*) | Chi-square (p) |
|--------------------------------------------------|-------|-------------------|----------------------|----------------|
| District                                         |       |                   |                      |                |
| Viseu                                            | 15    | 0                 | 15 (7.2; 100.0)      | <0.001         |
| Guarda                                           | 165   | 28 (13.5; 17.0)   | 137 (65.9; 83.0)     |                |
| Coimbra                                          | 28    | 12 (5.8; 42.9)    | 16 (7.7; 57.1)       |                |
| Pasture sharing                                  |       |                   |                      |                |
| Yes                                              | 105   | 13 (6.3; 12.4)    | 92 (44.2; 87.6)      | 0.011          |
| No                                               | 103   | 27 (13.0; 26.2)   | 76 (36.5; 73.8)      |                |
| Production purpose                               |       |                   |                      |                |
| Milk                                             | 208   | 40 (19.2; 19.2)   | 168 (80.8; 80.8)     | -              |
| Meat                                             | 0     | 0                 | 0                    |                |
| Sex                                              |       |                   |                      |                |
| Female                                           | 201   | 38 (18.3; 18.9)   | 163 (78.4; 81.1)     | 0.403*         |
| Male                                             | 7     | 2 (1.0)           | 5 (2.4)              |                |
| Breed                                            |       |                   |                      |                |
| Serra da Estrela                                 | 208   | 40 (19.2; 19.2)   | 168 (80.8; 80.8)     |                |
| Age (months)                                     |       |                   |                      |                |
| 0-12                                             | 3     | 1 (0.5; 33.3)     | 2 (1.0; 66.7)        | 0.475*         |
| >12                                              | 205   | 39 (18.8; 19.0)   | 166 (79.8; 81.0)     |                |
| Parasitological testing                          |       |                   |                      |                |
| Yes                                              | 15    | 0                 | 15 (7.2)             | 0.036*         |
| No                                               | 193   | 40 (19.2; 20.7)   | 153 (73.6; 79.3)     |                |
| Deworming frequency                              |       |                   |                      |                |
| Twice a year                                     | 148   | 26 (12.5; 17.6)   | 122 (58.7; 82.4)     | 0.339          |
| Annual                                           | 60    | 14 (6.7; 23.3)    | 46 (22.1; 76.7)      |                |
| Dewormer                                         |       |                   |                      |                |
| Eprinomectin (Eprecis®)                          | 45    | 20 (9.6; 44.4)    | 25 (12.0; 55.6)      | <0.001         |
| Albendazol (Sinvermin®)                          | 13    | 1 (0.5; 7.7)      | 12 (5.8; 92.3)       |                |
| Mebendazol + Closantel<br>(Seponver plus®)       | 60    | 12 (5.8; 20.9)    | 48 (23.1; 80.0)      |                |
| Ivermectin + clorsulon<br>(Topimec ®; Ivomec F®) | 90    | 7 (3.4; 7.8)      | 83 (39.9; 92.2)      |                |
|                                                  |       |                   |                      |                |

%- Percentage of total sheep; %\* - Percentage of the number of sheep per category; \*Fisher exact test

**Table S2.** Association between goats Protostrongylidae infection and background information, including animal signalment and parasitological information (n=203).

| Variable                                         | Total | Presence<br>n (%; %*) | Absence<br>n (%) | Chi-square (p) |
|--------------------------------------------------|-------|-----------------------|------------------|----------------|
| District                                         |       |                       |                  |                |
| Viseu                                            | 188   | 180 (88.7; 95.7)      | 8 (3.9; 4.3)     | 0.506*         |
| Guarda                                           | 0     | 0                     | 0                |                |
| Coimbra                                          | 15    | 14 (6.9; 93.3)        | 1 (0.5; 6.7)     |                |
| Pasture sharing                                  |       |                       |                  |                |
| Yes                                              | 0     | 0                     | 0                | -              |
| No                                               | 203   | 194 (95.6; 96.6)      | 9 (4.4; 4.4)     |                |
| Production purpose                               |       |                       |                  |                |
| Milk                                             | 30    | 23 (11.3; 76.7)       | 7 (3.4; 23.3)    | <0.001*        |
| Meat                                             | 173   | 171 (84.2; 98.8)      | 2 (1.0; 1.2)     |                |
| Sex                                              |       |                       |                  |                |
| Female                                           | 192   | 183 (90.1; 95.3)      | 9 (4.4; 4.7)     | 0.599*         |
| Male                                             | 11    | 11 (5.4)              | 0                |                |
| Breed                                            |       |                       |                  |                |
| Crossed breed Serrana<br>ecotype Transmontana    | 188   | 185 (91.1; 98.4)      | 3 (1.5; 1.6)     | <0.001*        |
| Serrana ecotype Jarmelista                       | 15    | 9 (4.4; 60.0)         | 6 (3.0; 40.0)    |                |
| Age (months)                                     |       |                       |                  |                |
| 0-12                                             | 18    | 18 (8.9; 100.0)       | 0                | 0.338*         |
| >12                                              | 185   | 176 (86.7; 95.1)      | 9 (4.4; 4.9)     |                |
| Parasitological testing                          |       |                       |                  |                |
| Yes                                              | 0     | 0                     | 0                |                |
| No                                               | 203   | 194 (95.6; 95.6)      | 9 (4.4; 4.4)     |                |
| Deworming frequency                              |       |                       |                  |                |
| Twice a year                                     | 15    | 9 (4.4; 60.0)         | 6 (3.0; 40.0)    | <0.001         |
| Annual                                           | 188   | 185 (91.1; 98.4)      | 3 (1.5; 1.6)     |                |
| Dewormer                                         |       |                       |                  |                |
| Eprinomectin (Eprecis®)                          | 15    | 9 (4.4; 60.0)         | 6 (3.0; 40.0)    | <0.001*        |
| Albendazol (Sinvermin®)                          | 173   | 171 (84.2; 98.8)      | 2 (1.0; 1.2)     |                |
| Mebendazol + Closantel<br>(Seponver plus®)       | 15    | 14 (6.9; 93.3)        | 1 (0.5; 6.7)     |                |
| Ivermectin + clorsulon<br>(Topimec ®; Ivomec F®) | 0     | 0                     | 0                |                |
|                                                  |       |                       |                  |                |

%- Percentage of total goats; %\*- Percentage of the number of goats per category; \* Fisher Exact Test
